# Supplementary material for: Evaluating the measures taken to contain a Candida auris outbreak in a tertiary care hospital in South India: an outbreak investigational study
Source: Springer Nature journal article supplement (doi:10.1186/s12879-021-06131-6), 2021-05-06
Supplement: MOESM1 [file 19140646]

## Additional file 1

### Candida auris checklist

| Sl. No | Measures to be executed                                                             | Yes | No |
|--------|-------------------------------------------------------------------------------------|-----|----|
| 1.     | Isolate the patient with 1:1 nursing and follow standard and contact precautions    |     |    |
|        | Hand hygiene                                                                        |     |    |
|        | Gloves, Gown, Mask                                                                  |     |    |
|        | Eye protection or face shield (in case of sputum candida positive)                  |     |    |
| 2.     | Patient decolonisation using Chlorhexidine or Octenidin body wash                   |     |    |
| 3.     | Environmental disinfection using 0.5% to 1% Sodium hypochlorite                     |     |    |
| 4.     | Identification of colonisation / invasive infection                                 |     |    |
| 5.     | In case of fungemia:                                                                |     |    |
|        | Appropriate selection of Antifungals                                                |     |    |
|        | Repeat blood culture after 48hours. If positive rule out endocarditis using TEE/TTE |     |    |
|        | Antifungal administered for 14days after documented negative blood cultures         |     |    |

|    |                                                                                                  |  |  |
|----|--------------------------------------------------------------------------------------------------|--|--|
| 6. | Source control                                                                                   |  |  |
| 7. | Terminal sterilization of equipments using 0.5% to 1% sodium hypochlorite                        |  |  |
| 8. | In case of surgery, infected patients should be the last to be taken for surgery on a given day. |  |  |
