# Supplementary material for: Evaluating the measures taken to contain a Candida auris outbreak in a tertiary care hospital in South India: an outbreak investigational study
Source: Springer Nature journal article supplement (doi:10.1186/s12879-021-06131-6), 2021-05-06
Supplement: MOESM2 [file 19140646]

## **Additional file 2**

### **Candida auris specific IPC activities**

#### **Information pamphlet for healthcare workers**

##### Isolation

- Single-patient room or in rooms with other patients with *C. auris*.

##### Duration of Infection control precautions

- CDC currently recommends continuing Contact Precautions until the patient is discharged from hospital.

##### Environmental disinfection

- 1 in 10 dilution sodium hypochlorite solution / wipes
- In every shift-3 times daily
- When possible after discharge /transfer-terminal cleaning of the room with fogging.

##### Decolonisation

- Adult to be wiped with 2% Chlorhexidine
- Pediatric patients to be wiped with Octenidin.
- At least change linen once daily unless soiled.
- Must be disinfected separately.

## **Treatment**

### Adults and children > 2 months of age

| <b>Echinocandin Drug</b> | <b>Adult dosing</b>                             | <b>Pediatric dosing</b>                                                                                    |
|--------------------------|-------------------------------------------------|------------------------------------------------------------------------------------------------------------|
| Micafungin               | 100 mg IV daily                                 | 2mg/kg/day IV with option to increase to 4mg/kg/day IV in children 40 kg                                   |
| Anidulafungin            | loading dose 200 mg IV,<br>then 100 mg IV daily | not approved for use in children                                                                           |
| Caspofungin              | loading dose 70 mg IV,<br>then 50 mg IV daily   | loading dose 70mg/m <sup>2</sup> /day IV, then 50mg/m <sup>2</sup> /day IV<br>(based on body surface area) |

Switching to a liposomal amphotericin B (5 mg/kg daily) could be considered if the patient is clinically unresponsive to echinocandin treatment or has persistent fungemia for >5 days.

### Neonates and infants <2 months of age

| <b>Echinocandin Drug</b> | <b>Neonatal dosing</b>                                       |
|--------------------------|--------------------------------------------------------------|
| Caspofungin              | 25 mg/m <sup>2</sup> /day IV<br>(based on body surface area) |
| Micafungin               | 10mg/kg/day IV                                               |
